# Supplementary material for: Luminescence declining behaviors in YAG:Ce transparent ceramics for high power laser lighting
Source: Royal Society of Chemistry journal article supplement (doi:10.1039/c9tc04637b), 2019-01-01
Supplement: c9tc04637b1.pdf [file c9tc04637b1.pdf]

## Electronic Supplementary Information

### Luminescence declining behaviors in YAG:Ce transparent ceramics for high power laser lighting

Jian Kang<sup>‡</sup><sup>a</sup>, Zhang Le<sup>‡</sup><sup>a,c,d\*</sup>, Yanbin Li<sup>a</sup>, Yuelong Ma<sup>a,b</sup>, Bingheng Sun<sup>a</sup>, Ying Liu<sup>a</sup>, Tianyuan Zhou<sup>a,c</sup>, Farida A Selim<sup>c</sup>, Chingping Wong<sup>d</sup>, Hao Chen<sup>a,\*</sup>

<sup>a</sup> Jiangsu Key Province Laboratory of Advanced Laser Materials and Devices, School of Physics and Electronic Engineering, Jiangsu Normal University, Xuzhou 221116, P.R. China

<sup>b</sup> School of Mechanical Engineering, Jiangsu University, Zhenjiang, 212013, P.R. China

<sup>c</sup> Center for Photochemical Sciences, Department of Physics and Astronomy, Bowling Green State University, Bowling Green 43403, USA

<sup>d</sup> School of Materials Science and Engineering, Georgia Institute of Technology, Atlanta 30332, USA

\* To whom correspondence should be addressed.

Tel: +86-0516-83403242; E-mail: [zhangle@jsnu.edu.cn](mailto:zhangle@jsnu.edu.cn) (Le Zhang), [chenhao@jsnu.edu.cn](mailto:chenhao@jsnu.edu.cn) (Hao Chen), [faselim@bgsu.edu](mailto:faselim@bgsu.edu) (Farida A Selim)

<sup>‡</sup> These authors contributed equally to this work.

## 1. Supporting figures

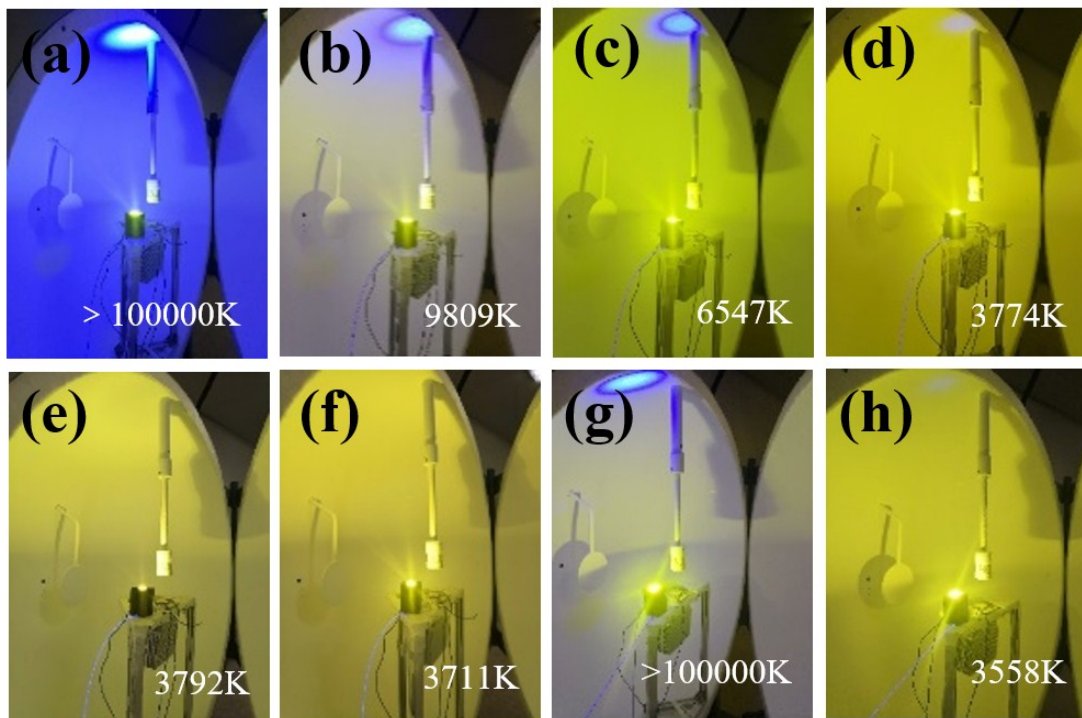

Fig. S1. The pictures of lighting effects (blue-laser spot) equipped with all samples under the lighting type in figure 2(b): (a):TC1; (b):TC2; (c):TC3; (d):TC4; (e):TC5; (f):TC6; (g):SC1; (h):SC2 (Input=2 W)

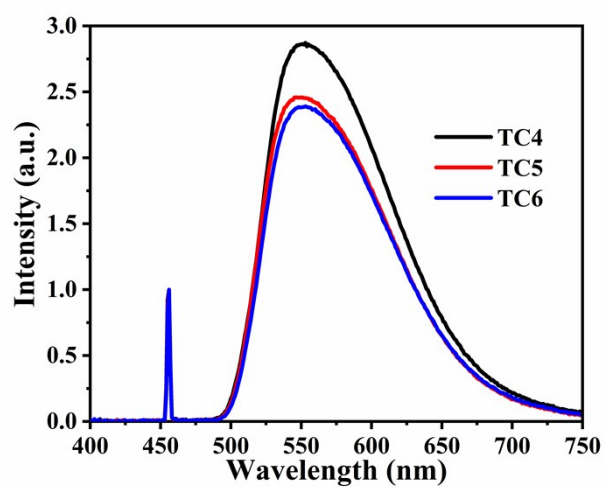

Fig. S2. Electroluminescence spectra of TC4, TC5 and TC6 under the lighting types in

Fig. 2(b). Running at a steady state (120 s).

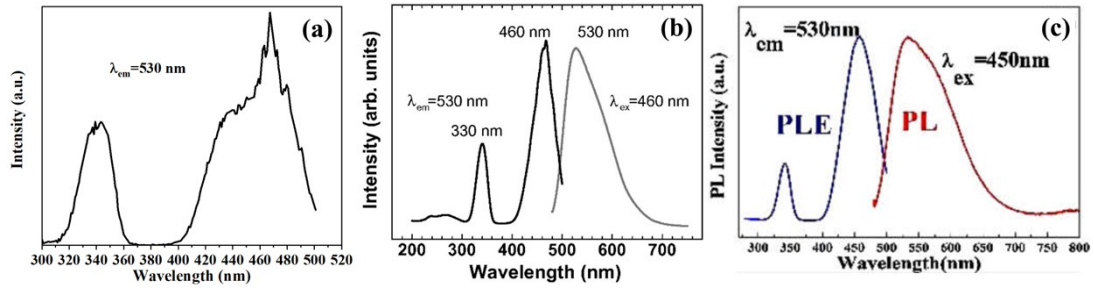

Fig. S3. PLE of transparent YAG:Ce ceramic: (a) our result (before fitting),

(b) Ref [53] and (c) Ref [54]

## 2 Supporting tables

Table S1. Luminous efficiencies based on YAG:Ce transparent ceramic in previous work

| Year | Power density         | Luminous efficiency | Reference |
|------|-----------------------|---------------------|-----------|
| 2019 | 1W mm <sup>-2</sup>   | 125 lm/W            | 1         |
|      | 16 W mm <sup>-2</sup> | 80 lm/W             |           |
| 2019 | 1W mm <sup>-2</sup>   | 152 lm/W            | 2         |
|      | 16 W mm <sup>-2</sup> | 147 lm/W            |           |
| 2018 | -----                 | 116 lm/W            | 3         |
| 2018 | 7 W mm <sup>-2</sup>  | 140 lm/W            | 4         |
|      | 16 W mm <sup>-2</sup> | 133 lm/w            |           |
| 2018 | -----                 | 176 lm/w            | 5         |
| 2018 | 40 W mm <sup>-2</sup> | 33 lm/W             | 6         |
| 2018 | 3 W mm <sup>-2</sup>  | 95 lm/W             | 7         |
|      | 8 W mm <sup>-2</sup>  | 70 lm/W             |           |
|      | 4 W mm <sup>-2</sup>  | 175 lm/W            |           |
| 2017 | 10 W mm <sup>-2</sup> | 133 lm/W            | 8         |
|      | 1W mm <sup>-2</sup>   | 121 lm/W            |           |
| 2017 | 13 W mm <sup>-2</sup> | 45 lm/W             | 9         |
|      | -----                 | 44 lm/W             |           |
| 2016 | -----                 | 44 lm/W             | 10        |

Table S2. Luminous efficiency (LE) of TLMs (without the phenomenon of blue-laser spot)

under the lighting types in Figure 2(b) (Input=2 W)

| Sample    | TC4 | TC5 | TC6 | SC2 |
|-----------|-----|-----|-----|-----|
| LE (lm/W) | 52  | 49  | 47  | 71  |

Table S3. CCT and LE under different the lighting types in Fig. 2(a, c) (Laser/LED on)

| Sample | Excited source | CCT (K)     | LE (lm/W)    |
|--------|----------------|-------------|--------------|
| TC4    | LED            | 4317        | 248.5        |
|        | <b>LD</b>      | <b>4575</b> | <b>173.4</b> |
| TC5    | LED            | 4642        | 236.4        |
|        | <b>LD</b>      | <b>4190</b> | <b>170.0</b> |
| TC6    | LED            | 4469        | 226.9        |
|        | <b>LD</b>      | <b>4007</b> | <b>170.8</b> |
| SC2    | LED            | 4053        | 269.2        |
|        | <b>LD</b>      | <b>4366</b> | <b>184.2</b> |

Table S4. The absorption intensity of YAG: Ce ceramic according to Fig. S3

| Wavelength | Absorption intensity |             |             |
|------------|----------------------|-------------|-------------|
|            | Our Results          | Ref [46]    | Ref [47]    |
| 445        | 0.60                 | 0.86        | 0.86        |
| <b>450</b> | <b>0.63</b>          | <b>0.93</b> | <b>0.94</b> |
| 455        | 0.64                 | 0.97        | 0.98        |
| <b>460</b> | <b>0.70</b>          | <b>1</b>    | <b>1</b>    |
| 465        | <b>0.83</b>          | 0.98        | 0.95        |
| <b>470</b> | <b>0.88</b>          | <b>0.8</b>  | <b>0.88</b> |



### 3 References in ESI

1. Z. H. Liu, S. X. Li, Y. H. Huang, L. J. Wang, H. Zhang, R. R. Jiang, F. Huang, X. M. Yao, X. J. Liu and Z. R. Huang, *J. Alloy. Compd.*, 2019, **785**, 125-130.
2. J. C. Wang, X. Y. Tang, P. Zheng, S. X. Li, T. L. Zhou and R. J. Xie, *J. Mater. Chem. C*, 2019, **7**, 3901-3908.
3. J. Xu, B. F. Hu, C. Xu, J. Wang, B. G. Liu, H. Li, X. L. Wang, B. L. Du and Y. X. Gong, *Opt. Mater.*, 2018, **86**, 286-290.
4. Z. H. Liu, S. X. Li, Y. H. Huang, L. J. Wang, Y. R. Yao, T. Long, X. M. Yao, X. J. Liu and Z. R. Huang, *Ceram. Int.*, 2018, **44**, 20232-20238.
5. C. Cozzan, G. Lheureux, N. O'Dea, E. E. Levin, J. Graser, T. D. Sparks, S. Nakamura, S. P. DenBaars, C. Weisbuch and R. Seshadri, *ACS Appl. Mater. Interfaces*, 2018, **10**, 5673-5681.
6. Y. H. Song, S. B. Kwon, M. K. Jung, W. K. Park, J. H. Yoo, C. W. Lee, B. K. Kang, W. S. Yang and D. H. Yoon, *Ceram. Int.*, 2018, **44**, 1182-1186.
7. S. Bin Kwon, S. H. Choi, J. H. Yoo, S. G. Jeong, Y. H. Song and D. H. Yoon, *Opt. Mater.*, 2018, **80**, 265-270.
8. Y. H. Song, E. K. Ji, B. W. Jeong, M. K. Jung, E. Y. Kim, C. W. Lee and D. H. Yoon, *Dyes Pigment.*, 2017, **139**, 688-692.
9. A. Krasnoshchoka, A. Thorseth, C. Dam-Hansen, D. D. Corell, P. M. Petersen and O. B. Jensen, *Materials*, 2017, **10**, 9.
10. S. X. Li, Q. Q. Zhu, D. M. Tang, X. J. Liu, G. Ouyang, L. L. Cao, N. Hirotsaki, T. Nishimura, Z. R. Huang and R. J. Xie, *J. Mater. Chem. C*, 2016, **4**, 8648-8654.
